# Supplementary material
Source: Research Square preprint supplement (doi:10.21203/rs.3.rs-9113896/v1)
Supplement: Supplementary file 1 [file 6b0375980117a906381e1ea8.pdf]

Command for binary logit (Determinants)

Logit handcraft participant sex age marital status education adult equivalent dependency ratio  
livestock\_ land size road distance market distance market info credit access training access social  
network .working area margins, dydx(\*)

or

logit HCPARTI sexHH AGEHH Martial EDUNL ADUEQU DEPEND TLU LANDSZ DSROAD  
DSMAR ACCINF CREDITACC NETWORK TRAIN WORKAR
