# Supplementary material
Source: Research Square preprint supplement (doi:10.21203/rs.3.rs-9113896/v1)
Supplement: Supplementary file 2 [file baa6472bc737a576891eb32f.docx]

| **Variables Acronyms** | **Description of the variables** | **Type of variable** | **Unit of measurement** | **Expected Sign** | **Reference** |
| --- | --- | --- | --- | --- | --- |
| HCA | Handcraft participation as dependant variable | Dummy | 1=participant,0 otherwise |  |  |
| SEXHH | Sex of household head | Dummy | 0= Female, 1 = Male | +/- | Abdi (2020), Abate (2018) |
| EDUL | The educational level | Continuous | Grade of the households | +/- | W/kidan and Tafesse (2023) |
| AGEHH | Age of the household | Continuous | Measure in year | -/+ | Nanda et al. (2019) |
| Martial | Marital status | Categorical | 0=unmarrid,1=married, | +/- | Jabeen et al., (2020) |
| ADUEQU | Household labor | Continuous | Adult equivalent | +/- | Abdurezak and Ahmed (2020), Igwe (2020) |
| DEPEND | Dependency ratio | Continuous | Dependency ratio | -/+ | Asfaw et al., (2017), Wake et al., *2020) |
| LIVES | Livestock ownership  of the households | Continuous | TLU | +/- | Abdurezak and Ahmed, (2020) W/kidan and Tafesse, (2023) |
| LAND | Total Land size | Continues | hectare | +/- | Neglo et al. (2021) |
| CRACC | Credit access | Dummy | 1=yes,0 otherwise | +/- | Yulisa and Permana (2022), Edota (2023) |
| ACCINFO | Access of market information | Dummy | Have access=1, 0=other | +/- | Ahmed et al. (2021)  Kazungu (2023) |
| DSMAR | Distance market | Continuous | Measure in walking hour | +/- | Damena and Habte (2017) |
| TRAIN | Training access | Dummy | Have access=1, 0=other | +/- | Abate (2018),  Gatdet (2021) |
| DSROAD | Road distance | Continuous | Measure in Kilometer | +/- | Dalal et al. (2024)  Damena and Habte (2017) |
| NETWORK | Member of social network | Dummy | 1 member,0=otherwise | +/- | Mohamed, (2019)  Bayu, (2021) |
| WORKAR | Working area | Dummy | 1,yes, 0= otherwise | + | Ferreira et al., (2019; Kazungu, (2023) |

Table 2
