# Supplementary material
Source: Research Square preprint supplement (doi:10.21203/rs.3.rs-9113896/v1)
Supplement: Supplementary file 3 [file d40e57413c740d2dbc3c662d.pdf]

# Determinants of Participation in Indigenous Handcraft Traditions: Evidence from Rural Households in Gondar Zuria District, Ethiopia.

The researcher is MSc. student in department of Rural Development and Agricultural Extension in specialization of agricultural extension and communication at University of Gondar, College of Agricultural and environmental science and the aim of this questioners are only research purpose.

Code \_\_\_\_\_

Name of interviewer \_\_\_\_\_

Signature \_\_\_\_\_

Date \_\_\_\_\_

Name of Kebele: \_\_\_\_\_

### Part one: Socio-economic and demographic characteristics of the respondents

1. Age of HH head \_\_\_\_\_ in years
2. Sex of respondents 1) Male 2) Female
3. Marital status: 1) Single 2) Married 3) Divorced 4) Widow/Widower
4. Educational status 1. Illiterate 2. Grade \_\_\_\_\_ 3. Diploma and above
5. Household size in number

|                  |     |      |       |       |       |     |
|------------------|-----|------|-------|-------|-------|-----|
| Age in years     | 0-5 | 5-10 | 10-15 | 15-25 | 15-65 | >65 |
| Number of Male   |     |      |       |       |       |     |
| Number of Female |     |      |       |       | 15-40 | >40 |

6. Land size=Timad (1ha= 4 **timad**); cultivated land size \_\_\_\_\_ (**Timad**) and grazing land size-----(**Timad**); forest(agroforstry) land size \_\_\_\_\_ (**Timad**)Other(if any) \_\_\_\_\_ Total land size \_\_\_\_\_

7. Total Livestock numbers

| Livestock type | Total number | Sold in number | Unit price | Livestock type    | Total number | Sold in number | Unit price |
|----------------|--------------|----------------|------------|-------------------|--------------|----------------|------------|
| Ox             |              |                |            | Donkey            |              |                |            |
| Cow            |              |                |            | Mule              |              |                |            |
| Calf           |              |                |            | Sheep             |              |                |            |
| Bull           |              |                |            | Goat              |              |                |            |
| Heifer         |              |                |            | Chicken (poultry) |              |                |            |
| Horse          |              |                |            |                   |              |                |            |

8. Do you have access to credit? 0) No 1)Yes
9. If yes, **Q8**, what are the amounts of credit in this year? \_\_\_\_\_birr
10. If yes, **Q 8**, what is your source of credit? 1)Savings and credit institutions 2)Commercial/developmental banks 3) Informal creditor's 4) others (mention) \_\_\_\_\_
11. If yes, **Q8**, for what purpose(s)? 1) Purchase of farm seed, fertilizer, implement, 2)Hiring labor 3) Household expenses (food, clothing and other supplies) 4) For loan repayment 5) Purchase of jewelry [ ] 6) To start handcraft business 7) Others specify \_\_\_\_\_
12. If no, **Q8**, what was the reason for not taking loan from formal credit institution? 1) The institution is not available 2) The institution is far from the Kebeles 3) It requires asset for collateral 4) The interest rate is too high 5) The loan payment time is not appropriate 6) Not allowed by religion 7) I use my own cash 8) I do not want 9) other mention \_\_\_\_\_
13. Distance of your home to nearest market \_\_\_\_\_(in walking hrs)
14. How far is the main road from your home? \_\_\_\_ (in walking hrs)
15. Do you feel there is a problem in transportation of your products to the nearest market?0) No 1)Yes

- 16. If yes **Q15** what do you think it's problem? 1) Long distance to the nearby market 2) No favorable road 3) No transportation services 4) Others mention \_\_\_\_\_
- 17. How do you take loading and crop yields to the nearest market? 1) Head/back load 2) Using animal back 3) Using vehicle 4) Using Carts 5) Others mention \_\_\_\_\_

**Part two**

- 18. Have you ever been involved in indigenous handcraft activities to generate more income? 0) No 1) Yes
- 19. If yes, **Q18** how long since you have started in practicing indigenous handcraft activities? \_\_\_\_\_ years.
- 20. If yes for **Q18**, what type of handcraft activities you have been involved in? 1) Pottery 2) Blacksmith activity 3) Leather work 4) Weaving 5) macramé 6) wood work 7) wicker 8) Other specify \_\_\_\_\_
- 21. If yes, **Q18** what was your most important motive for starting? 1) To get income 2) To support livelihood 3) Inadequate crop land 4) Large household size 5) Seasonal nature of agricultural labor 6) Handcraft work is more rewarding than farm work 7) high riskiness employment 8) Availability of craft work opportunities 10) Other, specify \_\_\_\_\_
- 22. If yes for **Q18** how do you start indigenous handcraft activities? 1) Neighboring farmers 2) Relatives and friends 3) Keble entrepreneur 4) From parents 5) experience from other areas 6) other specify \_\_\_\_\_
- 23. If you participated in indigenous handcraft employment, how do you undertake these activities?
  - 1) Temporarily/casually why? \_\_\_\_\_
  - 2) Seasonally or as par time activities, reason out \_\_\_\_\_
  - 3) Permanently, why \_\_\_\_\_
- 24. How often do you engage in indigenous handcraft activities?? 1) Daily 2) Weekly 3) Monthly 4) Occasionally 5) Rarely
- 25. Have you ever sold your indigenous handcrafted products? 0) No 1) Yes
- 26. Would you recommend handcraft activities to others? 0) No 1) Yes
- 27. If yes, q2 why? \_\_\_\_\_
- 28. How much money did you have when you start this activity \_\_\_\_\_ Birr
- 29. How much money earned from indigenous handcraft in one year? \_\_\_\_\_ Birr
- 30. Do you have any training related to indigenous handcraft activity for the last 12 months? 0) No 1) Yes
- 31. If yes for **Q30** from which organization did you get the training about indigenous handcraft activities? 1) Cooperative 2) NGOs 3) technical and vocational department 4) Other, specify \_\_\_\_\_
- 32. Do you need trainings and advices about indigenous handcraft activities to improve your business skill? 0) No 1) Yes
- 33. Have you taken any handcraft classes or workshops to improve your skills? 0) No 1) Yes
- 34. Have you ever received recognition or awards for your handcraft work? 0) No 1) Yes
- 35. Do you think that you have enough business knowledge about handcraft activity you engaged? 0) No 1) Yes
- 36. What are the benefits that you get from engaging indigenous handcraft activities? 1) Have access to basic needs for household members (food, water, cloth, medicine, 2) Ability to improve the house materials, 3) Able to get payments for school fees 4) to save more money 5) Other, specify \_\_\_\_\_
- 37. What are the main problems you faced related to indigenous handcraft activities in your locality? Rank based on their severity (very sever, sever, moderately sever, less sever, not sever) put ( ) mark

| No | Problems                                         | V, sever | Sever | M, sever | L, sever | Not sever |
|----|--------------------------------------------------|----------|-------|----------|----------|-----------|
| 1  | Low purchasing power of the local input material |          |       |          |          |           |

|    |                                        |  |  |  |  |  |
|----|----------------------------------------|--|--|--|--|--|
| 2  | Low market access                      |  |  |  |  |  |
| 3  | Low information access                 |  |  |  |  |  |
| 4  | Lack of knowledge & skill              |  |  |  |  |  |
| 5  | Lack of capital                        |  |  |  |  |  |
| 6  | Lack of credit                         |  |  |  |  |  |
| 7  | Lack of transport                      |  |  |  |  |  |
| 8  | Lack of sustainability of input supply |  |  |  |  |  |
| 10 | Lack of awareness training & advice    |  |  |  |  |  |
| 11 | Low level of demand for labor products |  |  |  |  |  |
| 12 | Lack of close supervision              |  |  |  |  |  |
| 13 | Inadequate asset/capital               |  |  |  |  |  |
| 14 | bad perception of society              |  |  |  |  |  |
| 15 | Low profitability of products          |  |  |  |  |  |
| 16 | Lack of employment opportunities       |  |  |  |  |  |
| 17 | Because of manufacturing good          |  |  |  |  |  |
| 18 | Lack of employment opportunities       |  |  |  |  |  |
| 19 | Others, specify                        |  |  |  |  |  |

38. What are the challenges that you faced for your handcraft work? \_\_\_\_\_

39. Do you do the work in group? 0) No 1) Yes

40. If yes Q39, what are the advantage of working together? specify \_\_\_\_\_

41. If no Q39, why specify \_\_\_\_\_

42. Do you have Information Access about handcraft? 0) No [ ] 1) Yes [ ]

43. What are your main sources of information about handcraft and manufacturing, unemployment and vocational training etc.)? 1) Relatives [ ] 2) friends [ ] 3) neighbors [ ] 4) Community bulletin board [ ] 5) Local market [ ] 6) National newspaper [ ] 7) Radio [ ] 8) Television [ ] 9) Groups or associations [ ] 10) Business or work associates [ ] 11) Community leaders [ ] 12) An agent of the government [ ] 13) NGOs [ ] 14) Other specify \_\_\_\_\_

44. From where did you get market information? 1) Neighbors [ ] 2) Friends [ ] 3) relatives [ ] 4) work and training department [ ] 5) Medias, [ ] 6) Others, specify \_\_\_\_\_

45. Did you make indigenous handcrafts in a group? 0) No [ ] 1) Yes [ ]

46. What are the opportunities to engage handcraft activities?

1. \_\_\_\_\_

2. \_\_\_\_\_

3. \_\_\_\_\_

#### Questions Related to Household income

1. Please tell us about all the work that members of your household have done and how much income they earned from doing that work during the previous production season (one year)

| Livelihood Activity             | Unit   | Total sold | Unit price | Total income |
|---------------------------------|--------|------------|------------|--------------|
| <b>Income from</b>              |        |            |            |              |
| crops, fruits, vegetables       | Kg     |            |            |              |
| <b>Selling Livestock/animal</b> |        |            |            |              |
| Livestock products:             |        |            |            |              |
| Milk, butter                    | Litter |            |            |              |

|                                                      |             |                                                        |  |
|------------------------------------------------------|-------------|--------------------------------------------------------|--|
| Honey                                                | Kg          |                                                        |  |
| Wax                                                  | Kg          |                                                        |  |
| Egg                                                  | No          |                                                        |  |
| Poultry                                              | No          |                                                        |  |
| Sell of manure or dung                               | Kg          |                                                        |  |
| Other farm income (mention) if any                   |             |                                                        |  |
| <b>EMPLOYMENT</b>                                    |             |                                                        |  |
| Public works(food-for-work, cash-for-work)           | Birr        |                                                        |  |
| Agricultural laborer on others farm                  | Birr        |                                                        |  |
| Daily laborer on handcraft activities                | Birr        |                                                        |  |
| Domestic work for others                             | Birr        |                                                        |  |
| Other employment(specify):                           | Birr        |                                                        |  |
| <b>TRADING(buying and selling)</b>                   |             |                                                        |  |
| Trading in food crops(grains, pulses, vegetables)    | Birr        |                                                        |  |
| Trading in livestock or livestock products           | Birr        |                                                        |  |
| Trading in other commodities petty trading           | Birr        |                                                        |  |
| <b>SALEOFNATURALPRODUCTS</b>                         |             |                                                        |  |
| Selling firewood                                     | Birr        |                                                        |  |
| Selling charcoal                                     | Birr        |                                                        |  |
| selling wild fruits                                  | Birr        |                                                        |  |
| Selling grass or fodder(for livestock)               | Birr        |                                                        |  |
| Selling of wood product                              | Birr        |                                                        |  |
| Other(specify)                                       | Birr        |                                                        |  |
| <b>Livelihood Activity</b>                           | <b>Unit</b> | <b>Total annual income earned<br/>(Birr per annum)</b> |  |
| <b>CRAFTS/SMALLINDUSTRY</b>                          |             |                                                        |  |
| Pottery                                              | Birr        |                                                        |  |
| Blacksmith work)                                     | Birr        |                                                        |  |
| Weaving                                              | Birr        |                                                        |  |
| Leather work                                         | Birr        |                                                        |  |
| Macramé                                              | Birr        |                                                        |  |
| Woodwork                                             | Birr        |                                                        |  |
| Wicker work                                          | Birr        |                                                        |  |
| Other(specify)                                       | Birr        |                                                        |  |
| <b>RENTS</b>                                         |             |                                                        |  |
| Land rent in                                         | Birr        |                                                        |  |
| Land rent out                                        | Birr        |                                                        |  |
| Renting out oxen for farming                         | Birr        |                                                        |  |
| Renting out pack animals for transport(e.g. donkeys) | Birr        |                                                        |  |
| Housing rent                                         | Birr        |                                                        |  |
| Other(specify)                                       | Birr        |                                                        |  |
| <b>FOOD&amp;DRINKPROCESSINGANDSELLING</b>            |             |                                                        |  |
| Selling drink(both soft and alcoholic)(tela,         | Birr        |                                                        |  |

|                     |      |  |
|---------------------|------|--|
| areki)              |      |  |
| Selling cooked food | Birr |  |
| Selling tea         | Birr |  |
| Other(specify)      | Birr |  |
| <b>OTHER</b>        |      |  |
| Remittances         | Birr |  |
| Pension             | Birr |  |
| Food aid in kind    | kg   |  |
| Compensation        | Birr |  |
| Other(specify)      | Birr |  |

**Perception towards handcraft activity** (Strongly disagree, Disagree, Neutral, Agree, Strongly Agree)

put this ( ) mark

|     |                                                                                   | SD | D | N | A | SA |
|-----|-----------------------------------------------------------------------------------|----|---|---|---|----|
| 1.  | Handcrafts can help to promote and celebrate diversity.                           |    |   |   |   |    |
| 2.  | Handcraft activity serve as a form of creative expression for society             |    |   |   |   |    |
| 3.  | I am satisfied with the financial returns from my handcraft activities            |    |   |   |   |    |
| 4.  | Handcraft activities have a positive impact on households' income.                |    |   |   |   |    |
| 5.  | Handcraft activities provide a sustainable source of income for households.       |    |   |   |   |    |
| 6.  | Handcraft activities are a good way to develop new skills.                        |    |   |   |   |    |
| 7.  | Local people have good perception towards handcraft maker/artisans.               |    |   |   |   |    |
| 8.  | Handcraft activities help me connect with others who share similar interests.     |    |   |   |   |    |
| 9.  | Handcraft activity helps preserve traditional craft skills and cultural heritage. |    |   |   |   |    |
| 10. | Handcraft activity creates a great a personal connection                          |    |   |   |   |    |
| 11. | Handcrafts also have the potential to stimulate local economies                   |    |   |   |   |    |
