# Supplementary material
Source: Research Square preprint supplement (doi:10.21203/rs.3.rs-9113896/v1)
Supplement: Supplementary file 4 [file fbbebf65fb38c5c059f86849.pdf]

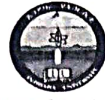

ቁጥር/Ref. No:-INU/CAFECs/RDAE/47/2025

ቀን/Date:-24/03/2025

### Ethical Approval

This study was conducted in accordance with the principles of the Declaration of Helsinki. Ethical approval was obtained from the Injibara University, College of Agriculture, Food and Climate Science, Department of Rural Development and Agricultural Extension Research Ethics Committee (Approval No.: INU/CAFECs/RDAE/46/2025; Date: March 24, 2025). The ethics committee, chaired by Mr. Amsalu Embiale Hunegnaw with members Mr. Mengistu Molla Akale, Mr. Girmaw Tsegaye Yimer, and Mr. Metadel Fekad Malede, confirmed that this study meets ethical standards and that there are no ethical concerns regarding the research article. Informed consent was obtained from all individual participants included in the study.

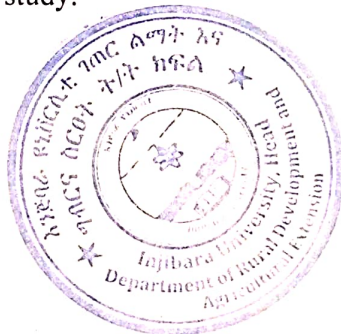

You're sincerely

Amsalu Embiale Hunegnaw

ገጠር ልማትና ግብርና ስርዓት  
ትምህርት ክፍል ኃላፊ  
Head, Department of Rural  
Development and  
Agricultural Extension
